# Supplementary material for: Postoperative patient-reported outcomes after revision total knee arthroplasty: Propensity- score-matched comparison with primary total knee arthroplasty
Source: Research Square preprint supplement (doi:10.21203/rs.3.rs-2053580/v1), 2022-09-15
Supplement: Supplementary file 1 [file 5bc529a9c765b0dd5c457c49.docx]

**Table 1.** Indications for revision total knee arthroplasty.

| Indication | Knees (percentage) |
| --- | --- |
| Aseptic loosening | 16 (38%) |
| Periprosthetic infection | 15 (36%) |
| Instability | 8 (19%) |
| Periprosthetic fracture | 1 (2%) |
| Polyethylene wear | 1 (2%) |
| Patellar dislocation | 1 (2%) |
