# Supplementary material for: Postoperative patient-reported outcomes after revision total knee arthroplasty: Propensity- score-matched comparison with primary total knee arthroplasty
Source: Research Square preprint supplement (doi:10.21203/rs.3.rs-2053580/v1), 2022-09-15
Supplement: Supplementary file 2 [file 9c47bc03dac0d31c5dba216d.docx]

**Table 3**. Average scores of primary and revision TKAs.

|  | Revision TKA (point) | Primary TKA (point) | Versus Primary TKA (%) |
| --- | --- | --- | --- |
| KSS-2011 total score | 85 | 115 | 74 |
| Joint perception | 3.0 | 3.8 | 79 |
| EQ-5D | 0.615 | 0.775 | 79 |

TKA, total knee arthroplasty; KSS-2011, Knee Society Score-2011; EQ-5D: EuroQol 5-Dimension.
