# Supplementary material for: Postoperative patient-reported outcomes after revision total knee arthroplasty: Propensity- score-matched comparison with primary total knee arthroplasty
Source: Research Square preprint supplement (doi:10.21203/rs.3.rs-2053580/v1), 2022-09-15
Supplement: Supplementary file 3 [file cbded77044d6524f3cc5d7a1.docx]

**Table 2**. Patient demographic data of propensity-score matched cohorts.

| Parameters | Revision TKA  (N = 20) | Primary TKA  (N = 40) | P-value |
| --- | --- | --- | --- |
| Age at survey, years | 72.2 ± 10.3 | 72.4 ± 10.5 | 0.61 |
| Sex (male: female) | 4: 16 | 9: 31 | 0.47 |
| BMI, kg/m2 | 26.4 ± 3.5 | 26.4 ± 3.9 | 0.5 |
| Diagnosis (OA:RA) | 17:3 | 35:5 | 0.54 |
| Follow-up period, years | 6.2 ± 3.7 | 3.8 ± 1.8 | 0.002 |

TKA: total knee arthroplasty, BMI: body mass index, OA: osteoarthritis, RA: rheumatoid arthritis.

Continuous values are expressed as mean ± standard deviation
