# Supplementary material for: Postoperative patient-reported outcomes after revision total knee arthroplasty: Propensity- score-matched comparison with primary total knee arthroplasty
Source: Research Square preprint supplement (doi:10.21203/rs.3.rs-2053580/v1), 2022-09-15
Supplement: Supplementary file 4 [file e08678dfe3a1bf4e1add655a.docx]

**Table 4**. Factors that affected patient-reported outcomes in revision TKA.

| Parameters | KSS-2011  Negative factors | Joint Perception  Negative factors | EQ-5D  Negative factors | Surgical Satisfaction  Negative factors |
| --- | --- | --- | --- | --- |
| Age at survey |  |  | Older* |  |
| Sex |  |  |  |  |
| BMI |  |  |  |  |
| Diagnosis |  |  |  |  |
| Indication of revision | Infection* |  |  |  |
| Implant type | RHK* | RHK* |  |  |

TKA, total knee arthroplasty; KSS, Knee Society Score; EQ-5D, EuroQol 5-Dimension; BMI, body mass index; RHK, rotating hinge knee.

*: p < 0.05
